1     **The global groundwater resistome: core ARGs**  
2     **and their dynamics - an *in silico* re-analysis of**  
3     **publicly available groundwater metagenomes**

4     Ioannis D. Kampouris<sup>1,2,\*</sup>, Thomas U. Berendonk<sup>1</sup>, Johan Bengtsson-  
5     Palme<sup>3,4,5</sup>, Uli Klümper<sup>1,\*</sup>

6

7     <sup>1</sup> Institute of Hydrobiology, Technische Universität Dresden, 01217 Dresden, Germany

8     <sup>2</sup> Arctic Research Centre, Department of Biology, Aarhus University, Aarhus, Denmark

9     <sup>3</sup> Division of Systems Biology, Department of Biology and Biological Engineering, Chalmers  
10    University of Technology, SE-412 96 Gothenburg, Sweden

11    <sup>4</sup> Department of Infectious Diseases, Institute of Biomedicine, The Sahlgrenska Academy,  
12    University of Gothenburg, Guldhedsgatan 10A, SE-413 46 Gothenburg, Sweden

13    <sup>5</sup> Centre for Antibiotic Resistance research (CARE) at University of Gothenburg, Gothenburg,  
14    Sweden

15    \* Corresponding authors

16 **Corresponding authors:**

17 Ioannis D. Kampouris (ORCID: 0000-0003-2093-5930) & Uli Klümper (ORCID: 0000-0002-

18 4169-6548)

19 Technische Universität Dresden

20 Institute of Hydrobiology

21 Zellescher Weg 40

22 01062 Dresden

23 Germany

24 E-mail: [ioannisds@yahoo.gr](mailto:ioannisds@yahoo.gr); [uli.kluemper@tu-dresden.de](mailto:uli.kluemper@tu-dresden.de)

25 **Graphical abstract**

26

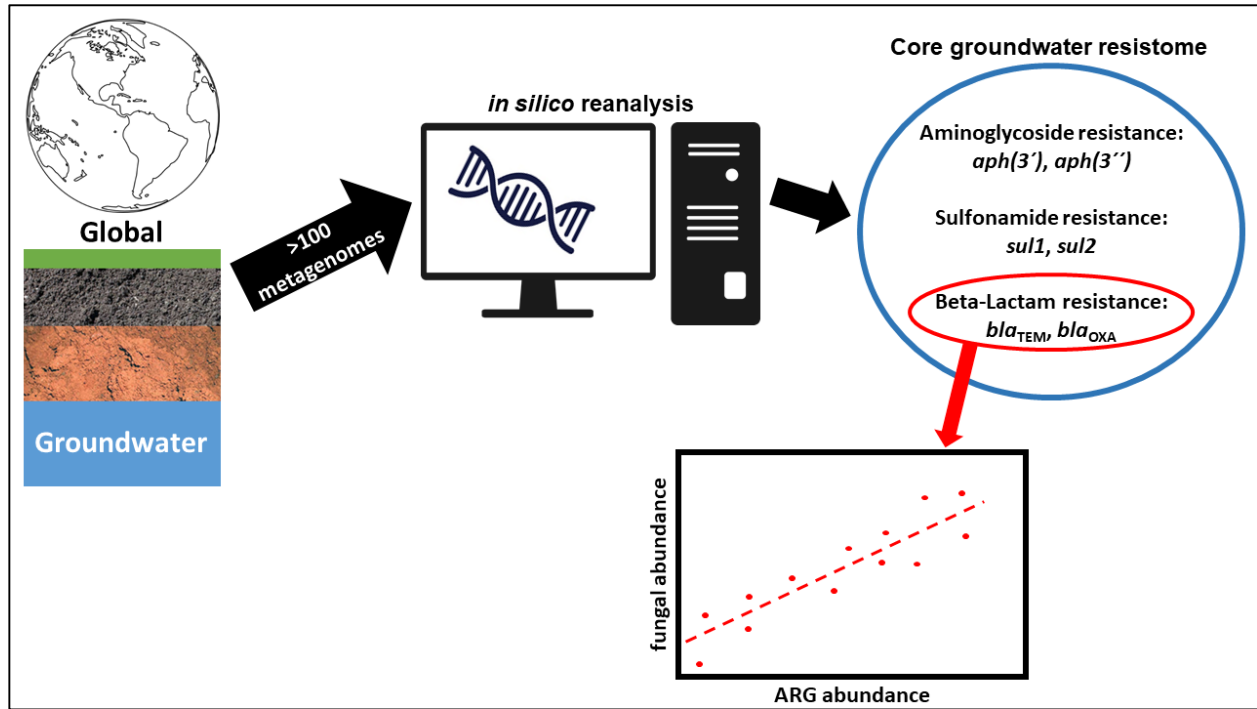

27

28

## 29 Abstract

30 Despite the importance of groundwater environments as drinking water resources, there is  
31 currently no comprehensive picture of the global levels of antibiotic resistance genes in  
32 groundwater. Moreover, the biotic and abiotic factors that might shape the groundwater  
33 resistome remain to be explored on a global scale. Herein, we attempted to fill this knowledge  
34 gap by *in silico* re-analysis of publicly available global groundwater metagenomes. We first  
35 investigated the occurrence of antibiotic resistance genes (ARGs) to define the core  
36 groundwater resistome. We further tested whether the ARG dissemination in the pristine  
37 groundwater environments could be explained by natural ecological processes such as  
38 competition between fungal and bacterial taxa. Six ARGs encoding resistance to  
39 aminoglycosides (*aph(3')*, *aph(3'')*), sulfonamides (*sul1*, *sul2*), and  $\beta$ -lactams (*bla<sub>OXA</sub>*, *bla<sub>TEM</sub>*)  
40 occurred in at least 50% of samples at high abundance, thereby constituting the core  
41 groundwater resistome. ARG abundances differed significantly between countries and only  
42 weakly correlated with bacterial community composition. While only limited effects of  
43 anthropogenic impacts could be observed, ecological interactions played a significant role in  
44 shaping the abundance patterns of at least a number of the core ARGs. Fungal abundance  
45 positively correlated with *bla<sub>TEM</sub>* and *bla<sub>OXA</sub>* abundance, ARGs that confer resistance to  $\beta$ -  
46 lactams, regularly produced by fungi. However, no direct correlation was determined for the  
47 remainder of the core ARGs. Still, using co-occurrence network analysis we identified that the  
48 fungal abundance acted as a hub-node that included *bla<sub>OXA</sub>* and *bla<sub>TEM</sub>*, but also indirectly  
49 contributed to the abundance of aminoglycoside ARG *aph(3')*. Hence, interactions between  
50 bacteria and fungi including potential antibiotic production can contribute to the dissemination of  
51 ARGs in groundwater environments. Consequently, fungal/bacterial SSU ratio could serve as an  
52 indicator for the abundance of certain ARGs in the pristine groundwater environments.

## 54 **Keywords**

55 Groundwater; Antimicrobial resistance; Antibiotic resistance; Fungi; Metagenomic re-analysis

56

## 57 **Highlights**

- 58 • Core GW resistome included *aph(3')*, *aph(3'')*, *sul1*, *sul2*, *bla<sub>OXa</sub>* and *bla<sub>TEM</sub>*
- 59 • Limited effects of anthropogenic impacts on GW resistome
- 60 • Fungal/bacterial abundance positively correlated with *bla<sub>TEM</sub>* and *bla<sub>OXa</sub>* abundance
- 61 • Fungal/bacterial abundance can serve as indicator for certain ARGs in groundwater

62

## 63 1. Introduction

64 The global rise in antimicrobial resistance (AMR) represents a major threat to future human  
65 health ([Laxminarayan et al., 2013](#)). Tackling it requires a “One Health” approach that considers  
66 AMR dynamics and proliferation between the human, veterinary and environmental spheres  
67 ([Hernando-Amado et al., 2019](#)). Drinking water resources provide one of the immediate  
68 connections between environmental and human microbiomes ([Vaz-Moreira et al., 2014](#)). Among  
69 these, groundwater (GW) ecosystems constitute the most common freshwater and drinking  
70 water resource in the majority of the world ([Szekeres et al., 2018](#); [Griebler and Avramov et al.,](#)  
71 [2015](#); [Herrmann et al., 2019](#)). GW environments are characterized by high microbial diversity  
72 and complexity ([Griebler and Lueders, 2009](#); [Flynn, et al., 2013](#); [Griebler and Avramov et al.,](#)  
73 [2014](#)), with GW microbiota playing important roles in several biogeochemical cycles ([Flynn et](#)  
74 [al., 2013](#); [Sonthiphand et al., 2019](#)). Due to the role of GW environments as a major drinking  
75 water resource, understanding the occurrence of AMR in GW environments is highly relevant for  
76 tackling AMR through a “One Health” approach ([Hernando-Amado et al., 2019](#)).

77 While several studies have focused on the importance of GW microbiota in biogeochemical  
78 cycles ([Flynn et al., 2013](#); [Sonthiphand et al., 2019](#); [Retter et al., 2021](#)) or in their response to  
79 pollution with toxic compounds ([Taş et al., 2018](#); [Sonthiphand et al., 2019](#)), only few have  
80 looked into the occurrence dynamics of ARGs in GW using qPCR or metagenomic approaches  
81 ([Szekeres et al., 2018](#); [Zhang et al., 2019](#); [Zaouri et al., 2020](#)). The potential anthropogenic  
82 impact on AMR in GW was demonstrated for GW beneath a commercially operated wastewater  
83 irrigated field ([Kampouris et al., 2022](#)). Here the abundance of specific antibiotic resistance  
84 genes (ARGs) increased in accordance with the infiltration of the respective antibiotics from  
85 wastewater into the GW. However, the majority of ARG abundance dynamics in more pristine  
86 GW environments remains difficult to explain. Consequently, a global and comprehensive

87 picture of the natural ARG levels in GW and the non-anthropogenic factors that might shape the  
88 GW resistome is needed.

89 Such global studies have been performed in terrestrial, non-anthropogenically impacted  
90 environments, such as soil and surface marine waters, and generally linked ARG dissemination  
91 partly to the competition between fungal and bacterial taxa (Bahram et al., 2018). Fungi  
92 regularly thrive in soils, in close interaction with other biota (Bahram et al., 2018) and can  
93 manipulate and shape the indigenous bacterial communities (Johnston et al., 2019). For  
94 example, several fungal taxa produce  $\beta$ -lactam antibiotics (e.g. penicillin) (Aly et al., 2011).  
95 Consequently, the specific complex fungi-bacteria interactions have been theorized as the  
96 cause underlying the natural prevalence of  $\beta$ -lactam ARGs in the environment (e.g. occurrence  
97 of *bla*<sub>TEM</sub> and *bla*<sub>CTX-M</sub> variants in relatively pristine soils) (Gatica et al., 2015). In GW  
98 environments most of the detected fungi function as saprophytic organisms, enabling the  
99 degradation of organic matter and performing organic carbon recycling (Nawaz et al., 2018).  
100 However, how the presence of these fungi and the resulting fungal-bacteria interactions in the  
101 humid, dark and pristine GW environments could affect the GW resistome has not yet been fully  
102 explored.

103 Herein, we aimed to fill the knowledge gaps regarding which ARGs constitute the core global  
104 GW resistome and if, similar to in pristine soils, interactions with fungi could provide an  
105 explanatory variable in shaping it. To this end, we performed an *in silico* re-analysis of publicly  
106 available global GW metagenomes retrieved from the NCBI sequencing read archive (SRA),  
107 specifically investigating which genes constituted the core resistome and how they related to the  
108 overall taxonomy of the GW communities.

## 109 **2. Methodology**

### 110 **2.1 Data collection of groundwater metagenomes**

111 Public metagenome datasets for samples from global GW environments were searched and  
112 obtained from the NCBI sequencing read archive (SRA). The search queries included the terms  
113 “groundwater”, “aquifer”, or “subsurface water”, for the matrices; and “shotgun sequencing” or  
114 “wgs” for the sequencing method. The information from SRA was linked to publications and  
115 locations, whenever available. Accession numbers and linked publications for all the retrieved  
116 metagenomic datasets (100 metagenomes in total) are given in Table S1. An additional 30  
117 identified candidate metagenomes from peer-reviewed studies were unfortunately not made  
118 publicly available or did not pass the quality criteria presented in the next section and were  
119 thereby excluded from the study.

## 120 **2.2 Annotation of antibiotic resistance gene profile and taxonomical composition**

121 For each metagenomic dataset general quality control and trimming were performed with the  
122 tool cutadapt (v3.1, [Martin, 2011](#)), with the following command: cutadapt --cores=10 --cut 20 -q  
123 10 --minimum-length 90 --max-n 0 --max-ee 0.1. The selection of a maximum expected error  
124 (ee) of 0.1 allowed only high quality sequences to pass. Sequences with a length of less than 90  
125 bp were filtered out, to ensure a sufficient read length for ARG annotation. ResFinder (Version  
126 4), a database of mobile, acquired antibiotic resistance genes ([Bortolaia et al., 2020](#)) was  
127 translated from nucleotide sequences into amino acid sequences using Biopython ([Cock et al.,](#)  
128 [2009](#)). ARGs were annotated against the translated ResFinder database using the command  
129 “blastx” in DIAMOND ([Buchfink et al., 2015](#)) with the following parameters: minimum identity  
130 99%, minimum match length 30 amino acids. The parameters were chosen to be conservative  
131 to reduce false positive hits. In case of paired-end sequencing, matches on the second paired  
132 read were counted only if there was no match on the first read. The tool METAXA2 (version  
133 2.2.3) ([Bengtsson-Palme et al., 2015](#)) was used for the identification of total small subunits of  
134 ribosome (SSU), 16S rRNA for prokaryotes and 18S rRNA for eukaryotes, to determine  
135 taxonomic composition, using the default settings. Screening for crAssphage sequences, an



136 indicator for anthropogenic fecal pollution, ([Karkman et al., 2019](#)) was performed with “ngless”  
137 ([Coelho et al., 2019](#)), which utilizes a version of the BWA-MEM algorithm for alignment ([Li,](#)  
138 [2013; Li and Durbin, 2010](#)).

139 To exclude any potential effects of differing sequencing depth on the estimated abundance of  
140 ARGs, we performed a correlation of total ARG abundances with total bacterial counts. This  
141 proved non-significant (Spearman rank correlation,  $R=-0.17$ ,  $p=0.1$ , Fig. S1B), hence  
142 sequencing depth can be excluded as a confounding factor.

### 143 **2.3 Data analyses and statistics**

144 Following ARG annotation and determination of the taxonomic composition, the results were  
145 analyzed in R (v4.0, [R Core Team, 2019](#)). The total bacterial and fungal counts for each  
146 metagenomic sample were calculated with the “tidyverse” packages (v1.0.4, [Wickham, 2019](#)).  
147 The ARG, bacterial and fungal relative abundances were calculated similarly using the same  
148 packages. The fungal 18S to bacterial 16S rRNA ratio was calculated using the “mutate”  
149 function from the package “dplyr” (v.1.0.10, [Wickham et al., 2022](#)). The package “ggplot2”  
150 (v.3.3, [Wickham, 2016](#)) was used for graphical representations.

151 Differences in the ARG composition based on Euclidean distance were visualized and  
152 evaluated using the “vegan” package (v.2.5.6, [Oksanen et al., 2019](#)) by generation of NMDS  
153 plots and statistical PERMANOVA tests. ARGs that were present with less than two reads in  
154 less than four metagenomes from a single country were removed from the differential analysis  
155 for ARGs. Countries with less than three available, high-quality metagenomes were excluded  
156 from the location based analysis as well. All data was  $\log_{10}$ -transformed. Since the sequencing  
157 depth of the retrieved metagenomes differed, for estimation of the differential gene abundances  
158 and distance metrics we first calculated the limit of detection (LOD) of the different samples (Fig.  
159 S1A). Then, zeros in abundance were replaced with an abundance of  $10^{-8}$  gene/SSU, which

160 was one order of magnitude below the sample with lowest LOD ( $3 \times 10^{-7}$ ). The differences in  
161 bacterial community composition were calculated similarly, with the sole exception that it was  
162 based on the Bray-Curtis dissimilarity of bacterial taxa at the family level.

163 For comparing the differential abundance of every single ARG per location, the Kruskal-Wallis  
164 test was performed with the use of the package “ggpubr” (v. 0.2.2, [Kassambara, 2019](#)). Mantel  
165 and Procrustes tests between ARG profile (Euclidean distance) and bacterial community  
166 composition (Family level, Bray-Curtis distance) were performed with the “vegan” package.

167 For correlation analyses, the data for different bacterial taxonomical groups, ARGs and  
168 fungal/bacterial 16S rRNA ratio was  $\log_{10}$  transformed and Spearman correlations coefficients  
169 were estimated with the package “ggpubr”. Samples with less than two positive hits for specific  
170 taxonomical groups or ARGs were excluded from the correlation analysis. In addition, linear  
171 mixed-effect models (package “lme4”, v1.1.3 [Bates et al., 2022](#)) were performed to account for  
172 confounding variability in sampling, DNA extraction, etc., to subsequently verify the  
173 hypothesized correlations. In these linear mixed-effect models, we used the original study of  
174 each metagenome as random variable.

175 To reveal a) whether total fungal abundance correlates with changes in bacterial community  
176 composition and b) whether these correlations can be linked to the fungal/ARG correlations, a  
177 co-occurrence network was constructed using Spearman correlation and Benjamini-Hochberg  
178 correction, with a threshold of  $p < 0.05$ . Samples without any positive hit were excluded to avoid  
179 correlations due to zero inflated data. For inclusion in the co-occurrence network, a minimum  
180 threshold was set: 25 samples with positive hits for each ARG or phylogenetic group. The co-  
181 occurrence network was constructed with the packages “igraph” ([Csardi et al., 2005](#)) and  
182 “ggraph” (v2, [Pedersen, 2022](#)).

### 183 3. Results and Discussion

#### 184 3.1 The core groundwater resistome

185 In total 99 of the 100 screened metagenomes (Table S1) from diverse geographical locations,  
186 including the US, Saudi Arabia, Japan and Germany, exceeded the high quality criteria (read  
187 size <90 bp, expected error rate <0.1/read) for subsequent re-analysis. ARGs were successfully  
188 detected in 87 of the 99 metagenomes. Overall, the common global GW resistome consisted of  
189 24 ARGs which were detected in at least three metagenomes at abundances above  $10^{-5}$  hits per  
190 bacterial SSU (Fig. S2). These confer resistance to 13 antibiotic classes including  
191 aminoglycosides,  $\beta$ -lactams, sulfonamides, and macrolides. Among these 24 ARGs, only the  
192 sulfonamide ARGs *sul1* and *sul2*, the  $\beta$ -lactam ARGs *bla*<sub>OXA</sub> and *bla*<sub>TEM</sub> and the aminoglycoside  
193 ARGs *aph*(3') and *aph*(3'') occurred in at least 50% of the metagenomes and throughout  
194 displayed significantly higher relative abundances compared to the remaining ARGs (Kruskal-  
195 Wallis test  $p < 2.2 \times 10^{-16}$ , Fig. S2). They hence constitute the core GW resistome (Fig. 1).

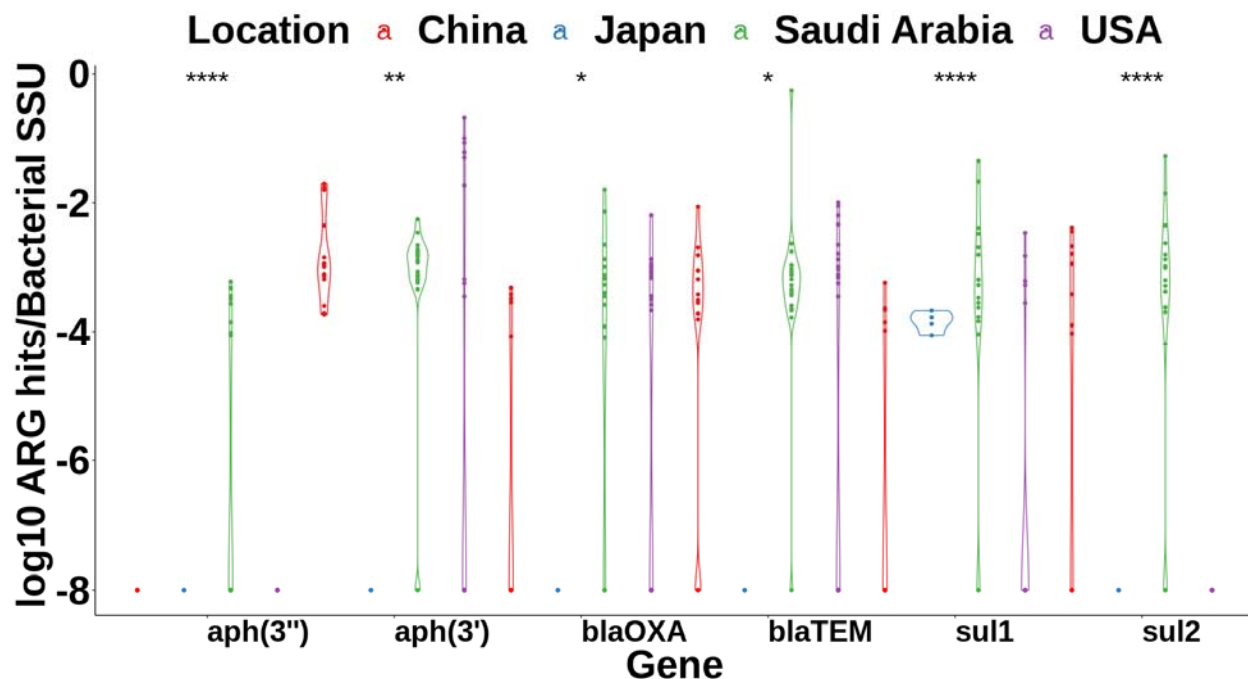

197 **Figure 1. Relative abundance of the ARGs that comprise the core resistome (occurred in at least 50% of the**  
198 **metagenomes). Countries with less than three high-quality groundwater metagenomes in which ARGs were**  
199 **detected, were excluded from this analysis. Significant differences were assessed with Kruskal-Wallis test**  
200 **(\* $p<0.05$ , \*\* $p<0.01$ , \*\*\* $p<0.001$ , \*\*\*\* $p<0.0001$ ,  $n=4-30$ ). Values of  $\log_{10}\leq-8$  ARG hits/Bacterial SSU represent**  
201 **samples with ARGs below the limit of detection, rather than actual values.**

202 Among the observed core ARGs, *bla*<sub>TEM</sub> abundance was consistently higher, compared to other  
203  $\beta$ -lactam ARGs. Variants of *bla*<sub>TEM</sub> have regularly been found to occur in high abundance in soil  
204 microbiota, with no clear relation to anthropogenic influence (Gatica et al., 2013; Kampouris et  
205 al., 2021; Wang et al., 2022). In previous studies, levels of *bla*<sub>TEM</sub> were found to be similar  
206 between wastewater and GW environments (Kampouris et al., 2021), while *bla*<sub>TEM</sub> was the  
207 dominant  $\beta$ -lactam ARG in GW environments, other  $\beta$ -lactam ARGs displayed up to two orders  
208 of magnitude higher abundances than *bla*<sub>TEM</sub> in wastewater (Kampouris et al., 2022). Similar  
209 trends were observed when comparing pristine and agricultural soils in Germany (Kampouris et  
210 al., 2021) and in China (Wang et al., 2022).

### 211 **3.2 Antibiotic resistance gene profiles diverge between different countries**

212 Resistome profiles based on the 24 detected common ARGs grouped significantly based on the  
213 originating countries (Fig. 2A, PERMANOVA test, Euclidean Distance,  $R^2=0.33$ ,  $p=1\times 10^{-6}$ ,  $n=4-$   
214  $30$ ; sample number differed per-study). Abundances of most ARGs strongly depended on  
215 location: for example, the highest abundance for most ARGs was detected in GW  
216 metagenomes originating from Saudi Arabia (Fig. 1). This was especially true for those ARGs  
217 that commonly occur in high abundance in wastewater microbiomes, such as *sul1* and *sul2*  
218 (Caucci et al., 2016; Cacace et al., 2019) (Fig. 1, Kruskal Wallis,  $p<0.001$ ,  $n=4-30$ ). These two  
219 genes confer resistance to sulfonamides, antibiotics of synthetic origin that have previously  
220 been shown to accumulate in GW with parallel increase of sulfonamide ARGs, especially in  
221 locations with extensive wastewater reuse for irrigation purposes (Avisar et al., 2009; Kampouris  
222 et al., 2022). Indeed, rates of wastewater reuse in Middle Eastern countries such as Saudi

223 Arabia far exceed those in the other countries tested here (Jones et al., 2021; Liao et al., 2021).  
224 Consequently, the direct infiltration of antibiotic resistant bacteria from wastewater irrigation, or  
225 the infiltration of selective agents such as sulfonamide antibiotics could explain the increased  
226 rates of ARGs in GWs of Saudi-Arabia. However, this hypothesis needs to be further tested,  
227 since the herein analyzed metagenomes might have originated from sampling different depths  
228 and types of GW environment (e.g. geyser or enclosed aquifer; Table S1), which could have  
229 acted as a confounding variable on the differences in ARG profiles across the varying locations.

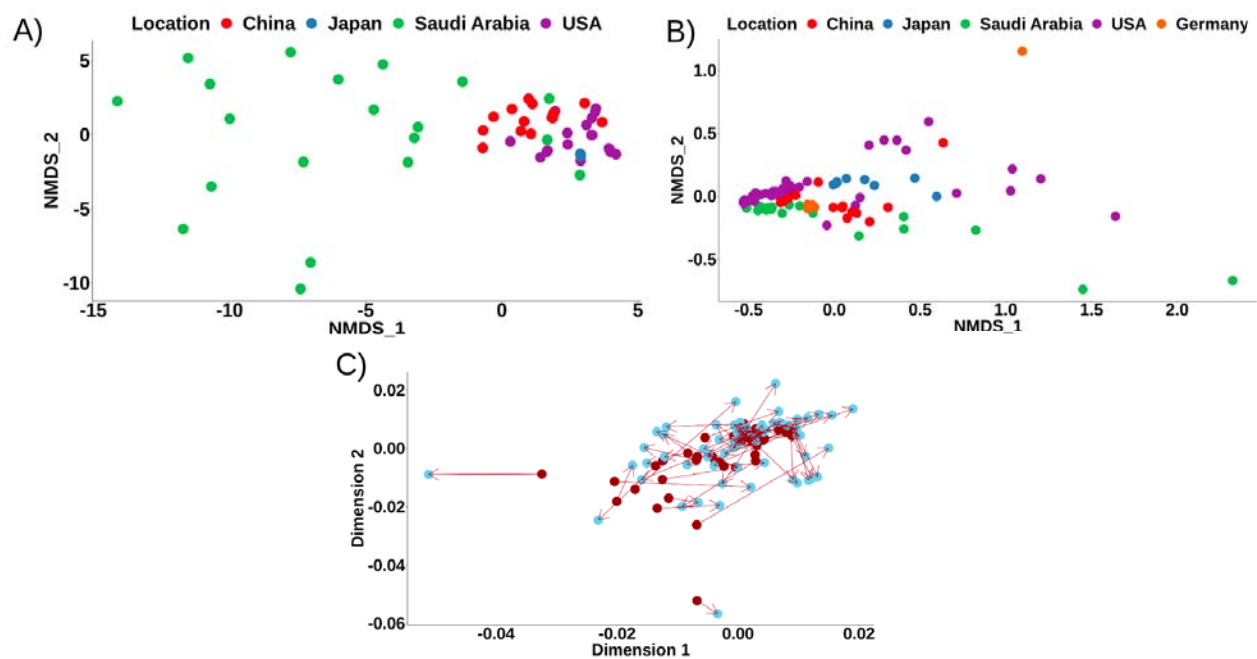

230

231 **Figure 2. A) NMDS grouping of ARG profiles of groundwater metagenomes by Euclidian distance based on**  
232 **country of origin (PERMANOVA test, Euclidean Distance,  $R^2=0.24$ ,  $p=1 \times 10^{-6}$ ,  $n=4-30$ ). ARGs that did not occur**  
233 **in more than three metagenomes from at least one single country were excluded. Countries with less than**  
234 **three high-quality groundwater metagenomes in which ARGs were detected, were also excluded from this**  
235 **analysis. B) Bacterial community composition based clustering of groundwater metagenomes by Bray-Curtis**  
236 **dissimilarity based on country of origin (PERMANOVA test, Bray-Curtis Distance,  $R^2=0.33$ ,  $p=1 \times 10^{-6}$ ,  $n=6-41$ ).**  
237 **C) Procrustes rotation plot between ARG profiles (Euclidean distance) and bacterial community composition**  
238 **(Bray-Curtis distance). Procrustes rotation was used to rotate the dissimilarity matrix of the bacterial**  
239 **community composition ( $\beta$ -diversity, Weighted Unifrac Distance) to maximum similarity with the target**

240 dissimilarity matrix of the ARG composition (Euclidean distance) by minimizing the sum of squared  
241 differences. The Procrustes plot visualizes the association between bacterial community and ARG  
242 composition. The length of the arrows visualizes the degree of match between the two ordinations following  
243 Procrustes rotation (arrow-start:  $\beta$ -diversity, arrow-end: ARG composition). Mantel test, Spearman  
244 correlation  $\rho=0.25$ ,  $p=0.001$ , Procrustes test  $\rho=0.62$ ,  $n=69$ .

245 To determine if such a potential direct effect of infiltration of fecal microorganisms to these GW  
246 environments exists, we quantified the abundance of crAssphage in the samples, which has  
247 been suggested as an indicator of pollution with fecal anthropogenic microorganisms (Karkman  
248 et al., 2019). Consequently, crAssphage presence would indicate that wastewater derived  
249 organisms were the main driving force underlying increased ARG abundance in these GW  
250 environments. However, no crAssphage reads were detected in any of the studied  
251 metagenomes, indicating that the infiltration of fecal organisms can be excluded as an  
252 explanatory variable for the increased levels of *sul1* and *sul2*. Still, the infiltration of selective  
253 agents independent of fecal organisms remains an option that has previously been observed for  
254 certain GW environments (Kampouris et al., 2022). However, this could not be tested in this  
255 study due to the lack of associated metadata on concentrations of antibiotics.

256 Similar to ARG profiles, the bacterial community compositions clustered by countries (Fig. 2B,  
257 PERMANOVA test, Bray-Curtis distance,  $R^2=0.24$ ,  $p=10^{-6}$ ,  $n=6-41$ ; sample number differed per-  
258 study). Still, bacterial community composition dissimilarity provided only a minor explanation for  
259 ARG compositional dissimilarities as only a weak significant correlation was found (Mantel test,  
260 Spearman correlation  $\rho=0.25$ ,  $p=0.001$ , Procrustes test,  $\rho = 0.62$ ,  $n=69$ , Fig. 2C).

### 261 **3.3 Correlation of fungal and antibiotic resistance gene abundances in groundwater** 262 **metagenomes**

263 Aside from bacterial community composition, we aimed at further exploring the underlying  
264 drivers of resistome diversity and abundance in the GW microbiota by evaluating if ecological

265 interactions with natural producers of antibiotics such as fungi and *Actinobacteria* could play a  
266 role in ARG dissemination (Bahram et al., 2018). Fungal activity has indeed been hypothesized  
267 to contribute to ARG dissemination and maintenance in environments with low levels of  
268 anthropogenic pollution with bacteria or selective agents (Bahram et al., 2018). We hence  
269 evaluated the correlation of the six core GW ARGs with fungal relative abundance  
270 (fungal/bacterial SSUs in the metagenomes). A clear correlation between fungal per bacterial  
271 abundance and  $bla_{TEM}$  abundance (Spearman  $\rho=0.48$ ,  $p=0.0039$ , Fig. 3) and a weak but  
272 significant correlation for  $bla_{OXA}$  abundance (Spearman  $\rho=0.36$ ,  $p=0.049$ , Fig. 3) were  
273 observed. No correlation was detected for the remaining core GW ARGs ( $sul1$ ,  $sul2$ ,  $aph(3')$ ,  
274  $aph(3'')$ ,  $p>0.05$ ). Consequently, fungal abundance correlated mainly with the levels of  $bla_{TEM}$   
275 and  $bla_{OXA}$ , which confer resistance to  $\beta$ -lactam antibiotics, commonly produced by several  
276 fungal species as secondary metabolites (Nesme and Simonet, 2015). The observed  
277 correlations for  $bla_{TEM}$  and  $bla_{OXA}$  were further verified using a linear mixed model. Here, the  
278 original study that the metagenomes were derived from was set as a random effect variable to  
279 counter potential study based biases (ARG Rel. Abundance  $\sim$  Fungal Rel. Abundance +  
280 1|Original\_Study) ( $p=0.0152$ ). When reducing study based biases with the linear mixed model  
281 the previously barely significant correlation for  $bla_{OXA}$  ( $p=0.049$ ) clearly increased in significance  
282 ( $p=0.008$ ).

283 We further examined the correlation of ARG abundance with *Actinobacteria*, known as the  
284 major group of bacterial antibiotic producers (Miao et al., 2010). *Actinobacteria* and  $bla_{TEM}$   
285 abundance weakly correlated initially ( $p=0.047$ , Fig. S3), but this could not be confirmed using  
286 the linear mixed model ( $p>0.05$ , ARG Rel. Abundance  $\sim$  *Actinobacteria* Rel. Abundance +  
287 1|Original\_Study). None of the remaining core-resistome ARGs significantly correlated with  
288 *Actinobacteria* abundance ( $p>0.05$ , Fig. S3).



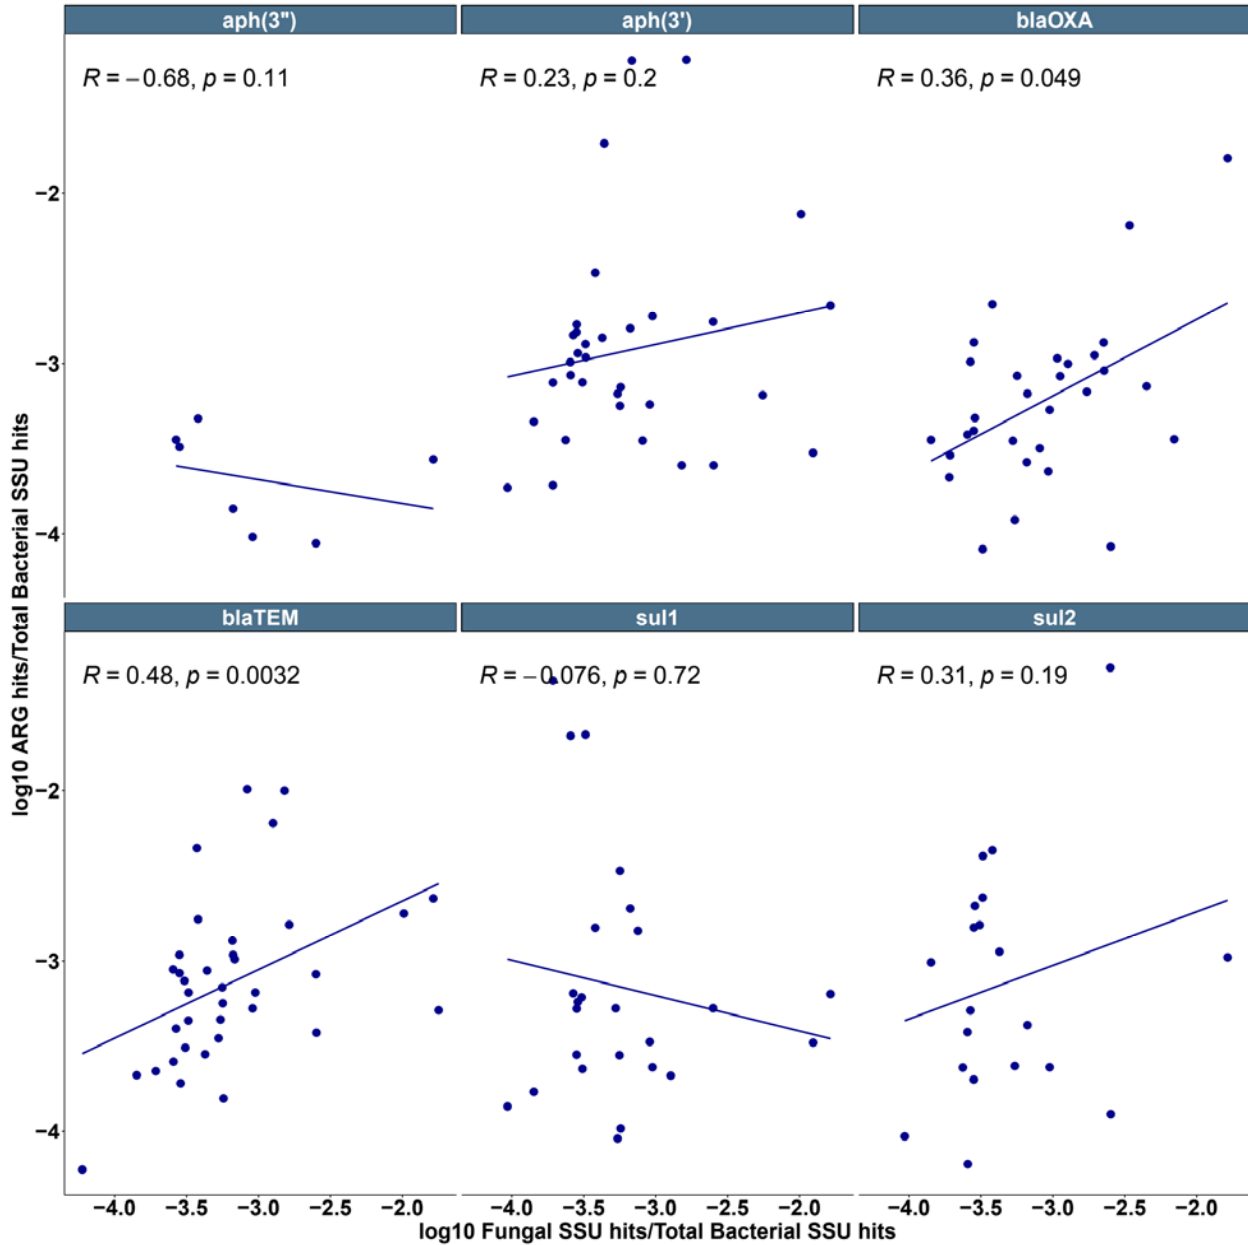

289

290 **Figure 3. Linear regression and correlation of the relative abundance of individual core groundwater ARGs to**  
291 **ribosomal fungal/bacterial small subunit (SSU) ratio (Spearman rank-correlation). Samples without fungal or**  
292 **ARG counts were excluded.**

### 293 **3.4 Fungal abundance might serve as an indicator for ARG abundance in groundwater** 294 **environments**

295 To further explore if fungal relative abundance can explain ARG GW dynamics, co-occurrence  
296 network analysis (Spearman correlation,  $p < 0.05$ , Benjamini-Hochberg correction) with bacterial



297 community composition (lowest taxonomical level: Order), fungi/bacteria SSU ratio and ARG  
298 abundances was performed. Of all 24 ARGs tested only three of the core GW ARGs *bla*<sub>TEM</sub>,  
299 *bla*<sub>OXA</sub> and *aph*(3') were included as a part of the correlation network (Fig. S4). As two of these  
300 were already previously associated with positive correlations with fungal abundance we  
301 extracted all correlations from the network which either one of the ARGs or the fungal/bacterial  
302 SSU ratio were a part of (Fig. 4). The three ARGs as well as the fungal/bacterial SSU ratio were  
303 part of one interconnected node hub. More specifically, all ARGs showed a direct or indirect  
304 connection (one common link) to the fungal/bacterial SSU ratio. Furthermore, all extracted  
305 correlations directly or indirectly connecting ARGs with fungal/bacterial SSU ratio were positive  
306 (Fig. 4). Specifically, *bla*<sub>TEM</sub> was directly positively correlated with fungal/bacterial SSU ratio and  
307 further indirectly connected through the bacterial order of *Corynebacteriales*, supporting the  
308 previously detected strong correlation of this ARG. Moreover, the relative abundance of *bla*<sub>TEM</sub>  
309 was the only explanatory factor connected to the aminoglycoside ARG *aph*(3') (Fig. 4), which  
310 supports the previously indicated weaker positive correlation with fungal relative abundance.  
311 Meanwhile, *bla*<sub>OXA</sub> was exclusively connected to the bacterial order of *Rhizobiales*, which was in  
312 turn providing the indirect link through positive correlation with the fungal/bacterial SSU ratio  
313 based on Spearman correlations.

314 In addition to the ARGs, fungal abundance was positively correlated with a number of individual  
315 bacterial taxa, however not a single antagonistic interaction was observed (Fig. 4). These  
316 observed positive correlations indicate potential mutualistic interactions. Selection for specific  
317 bacterial taxa was driven by their ability to co-exist with fungi, despite the potential production of  
318 secondary metabolites by fungi with negative effects on bacterial growth. Since  $\beta$ -lactam ARGs  
319 confer resistance to  $\beta$ -lactam antibiotic, which are commonly produced antibiotics by fungi (Aly  
320 et al., 2011), we hypothesize that these ARGs could potentially have enabled the co-existence

321 of several of these bacterial taxa with fungi, hence promoting their co-occurrence as individual,  
322 interconnected nodes within the correlation network centering around fungal abundance.

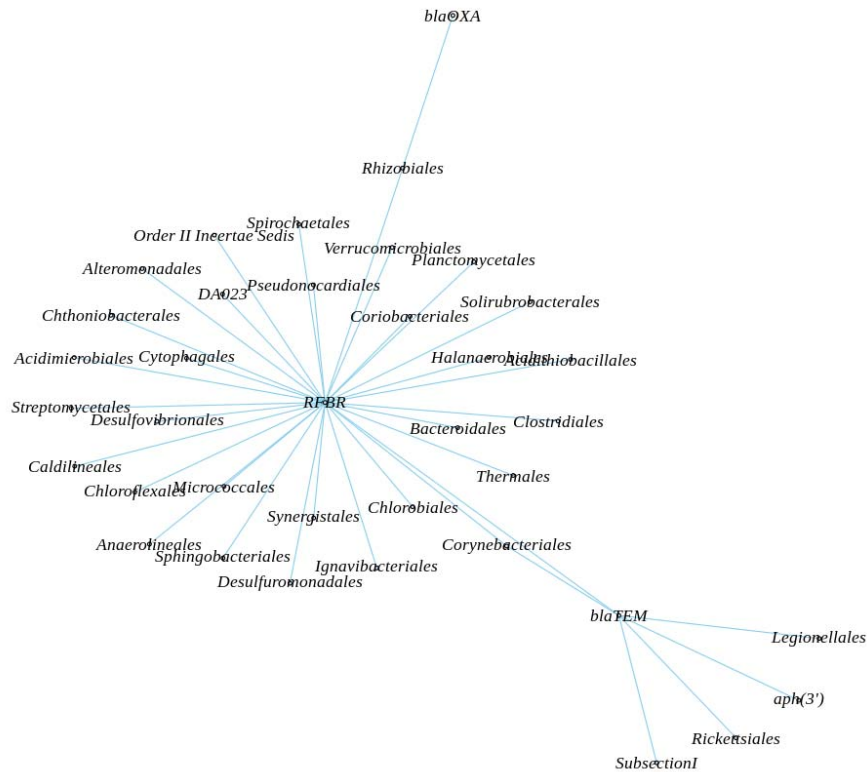

323

324 **Figure 4. Extract of correlations including either the ribosomal fungal/bacterial SSU ratio (RFBR) or any of**  
325 **the detected ARGs from the full co-occurrence network (Fig. S3). Only significant correlations based on**  
326 **Spearman Correlation with Benjamini-Hochberg correction for multiple testing ( $p < 0.05$ ) are shown. All**  
327 **extracted correlations within this network were significantly positive.**

328 In summary, ARGs were regularly only directly connected to a minor proportion of taxa but  
329 rather directly or indirectly connected to fungal abundance with positive correlations.  
330 Consequently, fungal abundance might serve as a better indicator for the abundance of certain  
331 ARGs in GW microbiomes than the bacterial community composition itself.

### 332 **3.5 Summary of results**

333 In the present *in silico* study we identified the common and core ARGs that make up the global  
334 GW resistome and elucidated potential drivers underlying their abundance patterns. The  
335 common GW ARGs conferred resistance to 13 antibiotic classes, while the core resistome was  
336 made up of six ARGs conferring resistance to sulfonamides,  $\beta$ -lactams and aminoglycosides.  
337 Local patterns regarding the intensity of anthropogenic factors were identified as a driving force  
338 behind the distribution of ARGs conferring resistance to the synthetic antibiotic class of  
339 sulfonamides. However, for  $\beta$ -lactams - natural, fungal-derived antibiotics (Nesme and Simonet,  
340 2015) - the relative abundance of these fungi provided a main explanatory variable. A previous  
341 investigation on global soil microbiota supports such a correlation of fungi with total ARGs  
342 (Bahram et al., 2018). While across soils co-selective effects for a number of antibiotic classes  
343 could be detected, in GW metagenomes only the  $\beta$ -lactam ARGs  $bla_{TEM}$  and  $bla_{OXA}$  were directly  
344 correlated with fungal abundance. In addition, fungal abundance served as indirect indication for  
345 the aminoglycoside ARG  $aph(3')$ , which belonged to the core GW resistome and indirectly  
346 correlated with fungal abundance through co-occurrence network analysis.

## 347 **4. Conclusion**

348 Overall we show that the re-analysis of publicly available data is a valuable tool for testing  
349 hypotheses currently present in the microbial ecology spectrum and elucidating potential global  
350 relationships between different microbial groups in GW environments. Specifically, we  
351 demonstrated that in the pristine GW environments, the global resistome is dominated by a  
352 small number of ARGs and that their abundance profiles, where mostly influenced by local  
353 conditions, while they can be partially shaped by microbe-microbe interactions. By using these  
354 *in silico* approaches we can pinpoint and identify potential microbe-microbe interactions for  
355 further verification in controlled laboratory experiments. In addition, we demonstrated that the  
356 bacterial/fungal SSU ratio could act as a direct and indirect indicator for the abundance of

357 specific ARGs in GW environments. We expect that with the increase of publicly available data,  
358 such *in silico* meta-analyses will be able to further identify ecological interactions in  
359 understudied environments in the future.

## 360 **5. Conflict of interest**

361 The authors declare no conflict of interest.

## 362 **6. Acknowledgements**

363 We deeply thank the researchers that uploaded and provided their sequencing data in the NCBI  
364 SRA databases, as without their contribution this study would have been impossible.

## 365 **7. Funding**

366 This work was supported by the JPI AMR - EMBARK and the ANTIVERSA project funded by  
367 the Bundesministerium für Bildung, und Forschung under grant numbers & F01KI1909A &  
368 01LC1904A, and the European Union's Horizon 2020 research and innovation program under  
369 the PRIMA program supported by the European Union under grant agreement No 1822. JBP  
370 acknowledges funding from the Swedish Research Council (VR; grant 2019-00299) under the  
371 frame of JPI AMR (EMBARK; JPIAMR2019-109) and the Data-Driven Life Science (DDLs)  
372 program supported by the Knut and Alice Wallenberg Foundation (KAW 2020.0239).  
373 Responsibility for the information and views expressed therein lies entirely with the authors.

## 374 **8. Data availability**

375 Data and the R and shell scripts for the workflow of analysis have been uploaded in  
376 [https://github.com/JonKampouris/GW\\_Resistome](https://github.com/JonKampouris/GW_Resistome).

377

## 9. References

378

1) Aly, A.H., Debbab, A., Proksch, P., 2011. Fungal endophytes: Unique plant inhabitants

379

with great promises. *Appl. Microbiol. Biotechnol.* 90, 1829–1845.

380

<https://doi.org/10.1007/s00253-011-3270-y>

381

2) Alygizakis, N.A., Urik, J., Beretsou, V.G., Kampouris, I., Galani, A., Oswaldova, M.,

382

Berendonk, T., Oswald, P., Thomaidis, N.S., Slobodnik, J., Vrana, B., Fatta-Kassinou,

383

D., 2020. Evaluation of chemical and biological contaminants of emerging concern in

384

treated wastewater intended for agricultural reuse. *Environ. Int.* 138, 105597.

385

<https://doi.org/10.1016/j.envint.2020.105597>

386

3) Avisar, D., Lester, Y., Ronen, D., 2009. Sulfamethoxazole contamination of a deep

387

phreatic aquifer. *Sci. Total Environ.* 407, 4278–4282.

388

<https://doi.org/10.1016/j.scitotenv.2009.03.032>

389

4) Bahram, M., Hildebrand, F., Forslund, S.K., Anderson, J.L., Soudzilovskaia, N.A.,

390

Bodegom, P.M., Bengtsson-Palme, J., Anslan, S., Coelho, L.P., Harend, H., Huerta-

391

Cepas, J., Medema, M.H., Maltz, M.R., Mundra, S., Olsson, P.A., Pent, M., Pölme, S.,

392

Sunagawa, S., Ryberg, M., Tedersoo, L., Bork, P., 2018. Structure and function of the

393

global topsoil microbiome. *Nature* 560, 233–237. <https://doi.org/10.1038/s41586-018->

394

0386-6

395

5) Bengtsson-Palme, J., Larsson, D.G.J., 2016. Concentrations of antibiotics predicted to

396

select for resistant bacteria: Proposed limits for environmental regulation. *Environ. Int.*

397

86, 140–149. <https://doi.org/10.1016/j.envint.2015.10.015>

398

6) Bortolaia, V., Kaas, R.S., Ruppe, E., Roberts, M.C., Schwarz, S., Cattoir, V., Philippon,

399

A., Allesoe, R.L., Rebelo, A.R., Florensa, A.F., Fagelhauer, L., Chakraborty, T.,

- 400 Neumann, B., Werner, G., Bender, J.K., Stingl, K., Nguyen, M., Coppens, J., Xavier,  
401 B.B., Malhotra-Kumar, S., Westh, H., Pinholt, M., Anjum, M.F., Duggett, N.A., Kempf,  
402 I., Nykäsenoja, S., Olkkola, S., Wieczorek, K., Amaro, A., Clemente, L., Mossong, J.,  
403 Losch, S., Ragimbeau, C., Lund, O., Aarestrup, F.M., 2020. ResFinder 4.0 for  
404 predictions of phenotypes from genotypes. *J. Antimicrob. Chemother.* 75, 3491–3500.  
405 <https://doi.org/10.1093/jac/dkaa345>.
- 406 7) Buchfink, B., Xie, C., Huson, D.H., 2014. Fast and sensitive protein alignment using  
407 DIAMOND. *Nat. Methods* 12, 59–60. <https://doi.org/10.1038/nmeth.3176>
- 408 8) Cacace, D., Fatta-Kassinos, D., Manaia, C.M., Cytryn, E., Kreuzinger, N., Rizzo, L.,  
409 Karaolia, P., Schwartz, T., Alexander, J., Merlin, C., Garelick, H., Schmitt, H., de Vries,  
410 D., Schwermer, C.U., Meric, S., Ozkal, C.B., Pons, M.N., Kneis, D., Berendonk, T.U.,  
411 2019. Antibiotic resistance genes in treated wastewater and in the receiving water  
412 bodies: A pan-European survey of urban settings. *Water Res.* 162, 320–330.  
413 <https://doi.org/10.1016/j.watres.2019.06.039>
- 414 9) Caucci, S., Karkman, A., Cacace, D., Rybicki, M., Timpel, P., Voolaid, V., Gurke, R.,  
415 Virta, M., Berendonk, T.U., 2016. Seasonality of antibiotic prescriptions for outpatients  
416 and resistance genes in sewers and wastewater treatment plant outflow. *FEMS*  
417 *Microbiol. Ecol.* 92, fiw060. <https://doi.org/10.1093/femsec/fiw060>
- 418 10) Cock, P.J.A., Antao, T., Chang, J.T., Chapman, B.A., Cox, C.J., Dalke, A., Friedberg, I.,  
419 Hamelryck, T., Kauff, F., Wilczynski, B., De Hoon, M.J.L., 2009. Biopython: Freely  
420 available Python tools for computational molecular biology and bioinformatics.  
421 *Bioinformatics* 25, 1422–1423. <https://doi.org/10.1093/bioinformatics/btp163>

- 422 11) Coelho, L.P., Alves, R., Monteiro, P., Huerta-Cepas, J., Freitas, A.T., Bork, P., 2019.  
423 NG-meta-profiler: Fast processing of metagenomes using NGLess, a domain-specific  
424 language. *Microbiome* 7, 1–10. <https://doi.org/10.1186/s40168-019-0684-8>
- 425 12) Csardi, Gabor, and Tamas Nepusz. 2005. The Igraph Software Package for Complex  
426 Network Research. *InterJournal Complex Systems*, 1695
- 427 13) Flynn, T.M., Sanford, R.A., Ryu, H., Bethke, C.M., Levine, A.D., 2013. Functional  
428 microbial diversity explains groundwater chemistry in a pristine aquifer Functional  
429 microbial diversity explains groundwater chemistry in a pristine aquifer. *BMC Microbiol.*  
430 13, 1.
- 431 14) Gatica, J., Jurkevitch, E., Cytryn, E., 2019. Comparative metagenomics and network  
432 analyses provide novel insights into the scope and distribution of  $\beta$ -lactamase  
433 homologs in the environment. *Front. Microbiol.* 10, 1–11.  
434 <https://doi.org/10.3389/fmicb.2019.00146>
- 435 15) Gatica, J., Yang, K., Pagaling, E., Jurkevitch, E., Yan, T., Cytryn, E., 2015. Resistance of  
436 undisturbed soil microbiomes to ceftriaxone indicates extended spectrum  $\beta$ -lactamase  
437 activity. *Front. Microbiol.* 6, 1–11. <https://doi.org/10.3389/fmicb.2015.01233>
- 438 16) Griebler, C., Avramov, M., 2015. Groundwater ecosystem services : a review 34, 355–  
439 367. <https://doi.org/10.1086/679903>.
- 440 17) Griebler, C., Lueders, T., 2009. Microbial biodiversity in groundwater ecosystems.  
441 *Freshw. Biol.* 54, 649–677. <https://doi.org/10.1111/j.1365-2427.2008.02013.x>
- 442 18) Hernando-Amado, S., Coque, T.M., Baquero, F., Martínez, J.L., 2019. Defining and  
443 combating antibiotic resistance from One Health and Global Health perspectives. *Nat.*  
444 *Microbiol.* 4, 1432–1442. <https://doi.org/10.1038/s41564-019-0503-9>

- 445 19) Herrmann, M., Wegner, C.E., Taubert, M., Geesink, P., Lehmann, K., Yan, L., Lehmann,  
446 R., Totsche, K.U., Küsel, K., 2019. Predominance of *Cand. Patescibacteria* in  
447 groundwater is caused by their preferential mobilization from soils and flourishing  
448 under oligotrophic conditions. *Front. Microbiol.* 10, 1–15.  
449 <https://doi.org/10.3389/fmicb.2019.01407>
- 450 20) Johnston, S.R., Boddy, L., Weightman, A.J., 2016. Bacteria in decomposing wood and  
451 their interactions with wood-decay fungi. *FEMS Microbiol. Ecol.* 92, 1–12.  
452 <https://doi.org/10.1093/femsec/fiw179>
- 453 21) Jones, E.R., Van Vliet, M.T.H., Qadir, M., Bierkens, M.F.P., 2021. Country-level and  
454 gridded estimates of wastewater production, collection, treatment and reuse. *Earth*  
455 *Syst. Sci. Data* 13, 237–254. <https://doi.org/10.5194/essd-13-237-2021>
- 456 22) Kampouris, I.D., Agrawal, S., Orschler, L., Cacace, D., Kunze, S., Berendonk, T.U.,  
457 Klümper, U., 2021. Antibiotic resistance gene load and irrigation intensity determine  
458 the impact of wastewater irrigation on antimicrobial resistance in the soil microbiome.  
459 *Water Res.* 193. <https://doi.org/10.1016/j.watres.2021.116818>
- 460 23) Kampouris, I.D., Alygizakis, N., Klümper, U., Agrawal, S., Lackner, S., Cacace, D.,  
461 Kunze, S., Thomaidis, N.S., Slobdonik, J., Berendonk, T.U., 2022. Elevated levels of  
462 antibiotic resistance in groundwater during treated wastewater irrigation associated  
463 with infiltration and accumulation of antibiotic residues. *J. Hazard. Mater.* 423, 127155.  
464 <https://doi.org/10.1016/j.jhazmat.2021.127155>
- 465 24) Karkman, A., Pärnänen, K., Larsson, D.G.J., 2019. Fecal pollution can explain antibiotic  
466 resistance gene abundances in anthropogenically impacted environments. *Nat.*  
467 *Commun.* 10, 1–8. <https://doi.org/10.1038/s41467-018-07992-3>



- 468 25) Kassambara, A., 2019. ggpubr R Package: ggplot2-Based Publication Ready Plots R  
469 package version 0.2.3 <https://CRAN.R-project.org/package=ggpubr>.
- 470 26) Laxminarayan, R., Duse, A., Wattal, C., Zaidi, A.K.M., Wertheim, H.F.L., Sumpradit, N.,  
471 Vlieghe, E., Hara, G.L., Gould, I.M., Goossens, H., Greko, C., So, A.D., Bigdeli, M.,  
472 Tomson, G., Woodhouse, W., Ombaka, E., Peralta, A.Q., Qamar, F.N., Mir, F., Kariuki,  
473 S., Bhutta, Z.A., Coates, A., Bergstrom, R., Wright, G.D., Brown, E.D., Cars, O., 2013.  
474 Antibiotic resistance-the need for global solutions. *Lancet Infect. Dis.* 13, 1057–1098.  
475 [https://doi.org/10.1016/S1473-3099\(13\)70318-9](https://doi.org/10.1016/S1473-3099(13)70318-9)
- 476 27) Li, H., 2013. Aligning sequence reads, clone sequences and assembly contigs with  
477 BWA-MEM 00, 1–3.
- 478 28) Li, H., Durbin, R., 2010. Fast and accurate long-read alignment with Burrows-Wheeler  
479 transform. *Bioinformatics* 26, 589–595. <https://doi.org/10.1093/bioinformatics/btp698>
- 480 29) Liao, Z., Chen, Z., Xu, A., Gao, Q., Song, K., Liu, J., Hu, H.Y., 2021. Wastewater  
481 treatment and reuse situations and influential factors in major Asian countries. *J.*  
482 *Environ. Manage.* 282. <https://doi.org/10.1016/j.jenvman.2021.111976>
- 483 30) Linares, J.F., Gustafsson, I., Baquero, F., Martinez, J.L., 2006. Antibiotics as  
484 intermicrobiol signaling agents instead of weapons. *Proc. Natl. Acad. Sci. U. S. A.* 103,  
485 19484–19489. <https://doi.org/10.1073/pnas.0608949103>
- 486 31) Martin, M. 2011. Cutadapt removes adapter sequences from high-throughput  
487 sequencing reads. *EMBnet.journal*, 17(1), pp. 10-12.  
488 doi:<https://doi.org/10.14806/ej.17.1.200>
- 489 32) Miao, V, Davies, J. Actinobacteria: The good, the bad, and the ugly. *Antonie van*  
490 *Leeuwenhoek, Int J Gen Mol Microbiol* 2010; 98: 143–150.

- 491 33) Nawaz, A., Purahong, W., Lehmann, R., Herrmann, M., Totsche, K.U., Küsel, K., Wubet,  
492 T., Buscot, F., 2018. First insights into the living groundwater mycobiome of the  
493 terrestrial biogeosphere. *Water Res.* 145, 50–61.  
494 <https://doi.org/10.1016/j.watres.2018.07.067>
- 495 34) Nesme J, Simonet P. The soil resistome: A critical review on antibiotic resistance origins,  
496 ecology and dissemination potential in telluric bacteria. *Environ Microbiol* 2015; 17:  
497 913–930.
- 498 35) Oksanen; J., Blanchet; F.G., Friendly; M., Kindt; R., Legendre; P., McGlinn; D., Minchin;  
499 P.R., O'Hara; R.B., Simpson; G.L., Solymos; P.M. Stevens; H.H., Szoecs; E., Wagner  
500 H., 2019. *vegan* R package: an R package for community ecologists. R package  
501 version 2.5-6. <https://cran.rproject.org/package=vegan>
- 502 36) Pedersen T (2022). *ggraph*: An Implementation of Grammar of Graphics for Graphs and  
503 Networks. <https://ggraph.data-imaginist.com>, <https://github.com/thomasp85/ggraph>.
- 504 37) R Core Team, R: A language and environment for statistical computing R Foundation for  
505 Statistical Computing, Vienna, Austria (2019)
- 506 38) Retter, A., Karwautz, C., Griebler, C., 2021. Groundwater microbial communities in times  
507 of climate change. *Curr. Issues Mol. Biol.* 41, 509–538.  
508 <https://doi.org/10.21775/cimb.041.509>
- 509 39) Sonthiphand, P., Ruangroengkulrith, S., Mhuantong, W., Charoensawan, V.,  
510 Chotpantararat, S., Boonkaewwan, S., 2019. Metagenomic insights into microbial  
511 diversity in a groundwater basin impacted by a variety of anthropogenic activities.  
512 *Environ. Sci. Pollut. Res.* 26, 26765–26781. [https://doi.org/10.1007/s11356-019-](https://doi.org/10.1007/s11356-019-05905-5)  
513 [05905-5](https://doi.org/10.1007/s11356-019-05905-5)

- 514 40) Spielmeier A, Höper H, Hamscher G. Long-term monitoring of sulfonamide leaching  
515 from manure amended soil into groundwater. *Chemosphere* 2017; 177: 232–238.
- 516 41) Szekeres, E., Chiriac, C.M., Baricz, A., Szőke-Nagy, T., Lung, I., Soran, M.L., Rudi, K.,  
517 Dragos, N., Coman, C., 2018. Investigating antibiotics, antibiotic resistance genes, and  
518 microbial contaminants in groundwater in relation to the proximity of urban areas.  
519 *Environ. Pollut.* 236, 734–744. <https://doi.org/10.1016/j.envpol.2018.01.107>
- 520 42) Taş, N., Brandt, B.W., Braster, M., van Breukelen, B.M., Röling, W.F.M., 2018.  
521 Subsurface landfill leachate contamination affects microbial metabolic potential and  
522 gene expression in the Banisveld aquifer. *FEMS Microbiol. Ecol.* 94, 1–12.  
523 <https://doi.org/10.1093/femsec/fiy156>
- 524 43) Vaz-Moreira, I., Nunes, O.C., Manaia, C.M., 2014. Bacterial diversity and antibiotic  
525 resistance in water habitats: Searching the links with the human microbiome. *FEMS*  
526 *Microbiol. Rev.* 38, 761–778. <https://doi.org/10.1111/1574-6976.12062>
- 527 44) Wang, H., Su, X., Su, J., Zhu, Y., Ding, K., 2022. Profiling the antibiotic resistome in soils  
528 between pristine and human-affected sites on the Tibetan Plateau. *J. Environ. Sci.*  
529 (China) 111, 442–451. <https://doi.org/10.1016/j.jes.2021.04.019>
- 530 45) Wickham H. *ggplot2: Elegant Graphics for Data Analysis*. Springer (2016)
- 531 46) Wickham, H., François, R., Henry, L., Müller, K. 2022. *dplyr: A Grammar of Data*  
532 *Manipulation*. <https://dplyr.tidyverse.org>, <https://github.com/tidyverse/dplyr>.
- 533 47) Wickham; H., Averick; M., Bryan; J., Chang; W., McGowan; L., François; R., Golemund;  
534 G., Hayes; A., Henry; L., Hester; J., Kuhn; M., Pedersen; T., Miller; E., Bache; S.,  
535 Müller; K., Ooms; J., Robinson; D., Seidel; D., Spinu; V., Takahashi; K., Vaughan; D.,

- 536 Wilke; C., Woo; K., Yutani; H. Welcome to the Tidyverse. J. Open Source Softw. 2019;  
537 4 (43); 1686. <https://doi.org/10.21105/joss.01686>.
- 538 48) Yan L, Herrmann M, Kampe B, Lehmann R, Totsche KU, Küsel K. Environmental  
539 selection shapes the formation of near-surface groundwater microbiomes. Water Res  
540 2020; 170: 115341.
- 541 49) Zaouri, N., Jumat, M.R., Cheema, T., Hong, P.Y., 2020. Metagenomics-based evaluation  
542 of groundwater microbial profiles in response to treated wastewater discharge.  
543 Environ. Res. 180, 108835. <https://doi.org/10.1016/j.envres.2019.108835>
- 544 50) Zhang, Y. Zhang, Yuanzhu, Kuang, Z., Xu, J., Li, C., Li, Y., Jiang, Y., Xie, J., 2019.  
545 Comparison of Microbiomes and Resistomes in Two Karst Groundwater Sites in  
546 Chongqing, China. Groundwater 57, 807–818. <https://doi.org/10.1111/gwat.12924>
